# Supplementary material for: Secondary aerosol formation during a special dust transport event: impacts from unusually enhanced ozone and dust backflows over the ocean
Source: Copernicus journal article supplement (doi:10.5194/acp-23-13853-2023), 2023-11-07
Supplement: Supplementary file 1 [file acp-23-13853-2023-supplement.pdf]

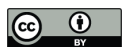

*Supplement of*

## **Secondary aerosol formation during a special dust transport event: impacts from unusually enhanced ozone and dust backflows over the ocean**

**Da Lu et al.**

*Correspondence to:* Kan Huang ([huangkan@fudan.edu.cn](mailto:huangkan@fudan.edu.cn))

The copyright of individual parts of the supplement might differ from the article licence.

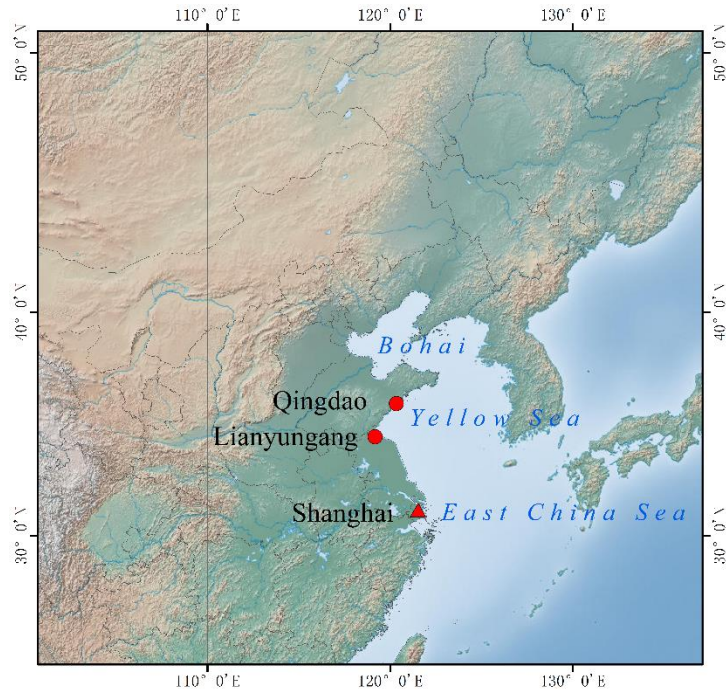

Figure S1. The observational sites in this study, including Shanghai, Qingdao, and Lianyungang. The map is created by ArcGIS 10.2.

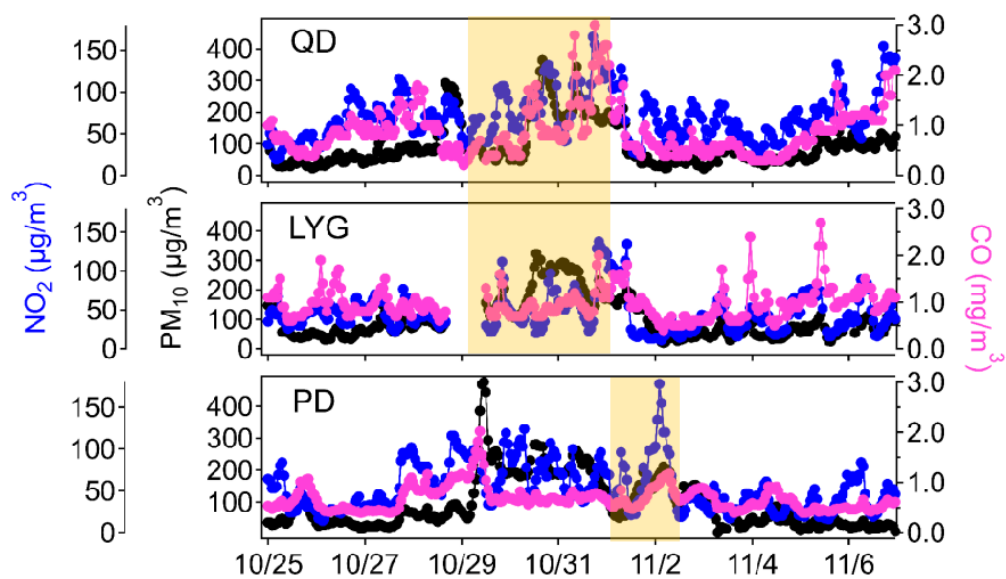

Figure S2. Time-series of  $\text{PM}_{10}$ ,  $\text{NO}_2$ , and  $\text{CO}$  at Qingdao, Lianyungang, and Pudong. The dust periods at these three sites are highlighted.

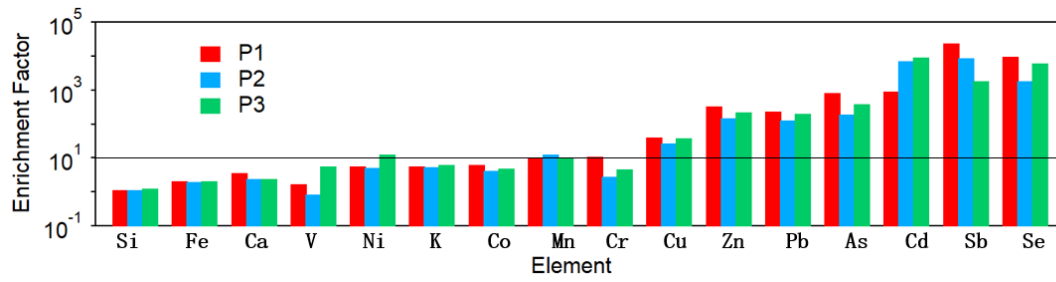

Figure S3. Enrichment factors of elements in PM<sub>2.5</sub> during the three dust stages.

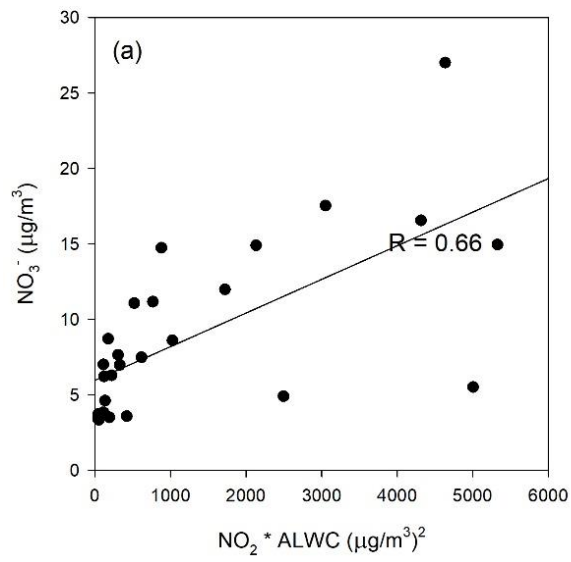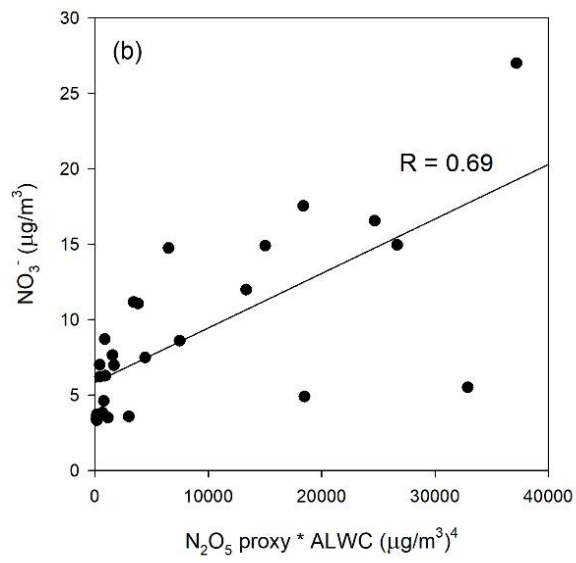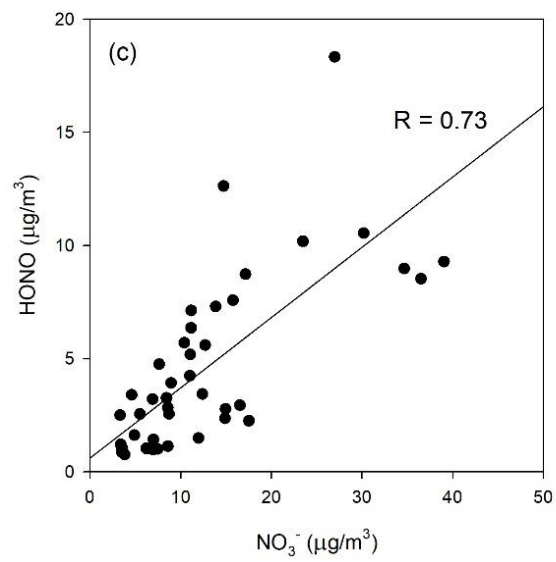

Figure S4. Correlation between  $\text{NO}_3^-$  and (a)  $\text{NO}_2^* \text{ALWC}$ , (b)  $\text{N}_2\text{O}_5 \text{ proxy}^* \text{ALWC}$ , and (c) HONO

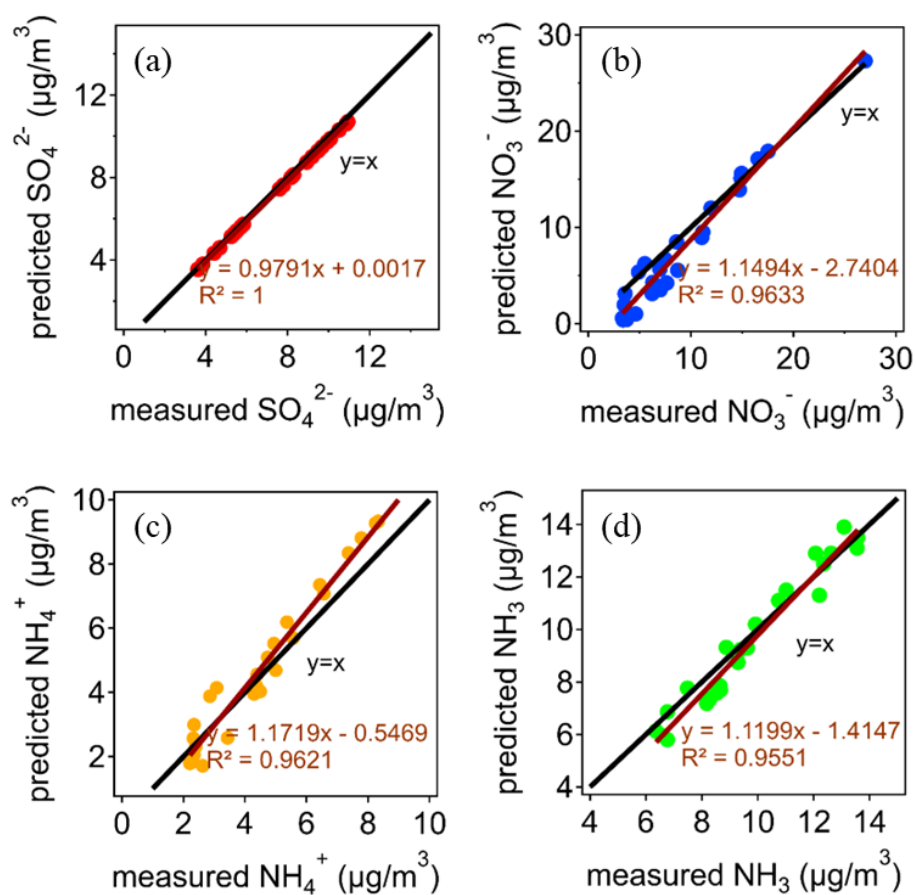

Figure S5. Correlations between the ISORROPIA - II predicted and measured species of (a)  $\text{SO}_4^{2-}$ , (b)  $\text{NO}_3^-$ , (c)  $\text{NH}_4^+$ , and (d)  $\text{NH}_3$  for the  $\text{SO}_4^{2-}$ - $\text{NO}_3^-$ - $\text{NH}_4^+$ - $\text{Cl}^-$ - $\text{NH}_3$ - $\text{HCl}$ - $\text{HNO}_3$  system during P3

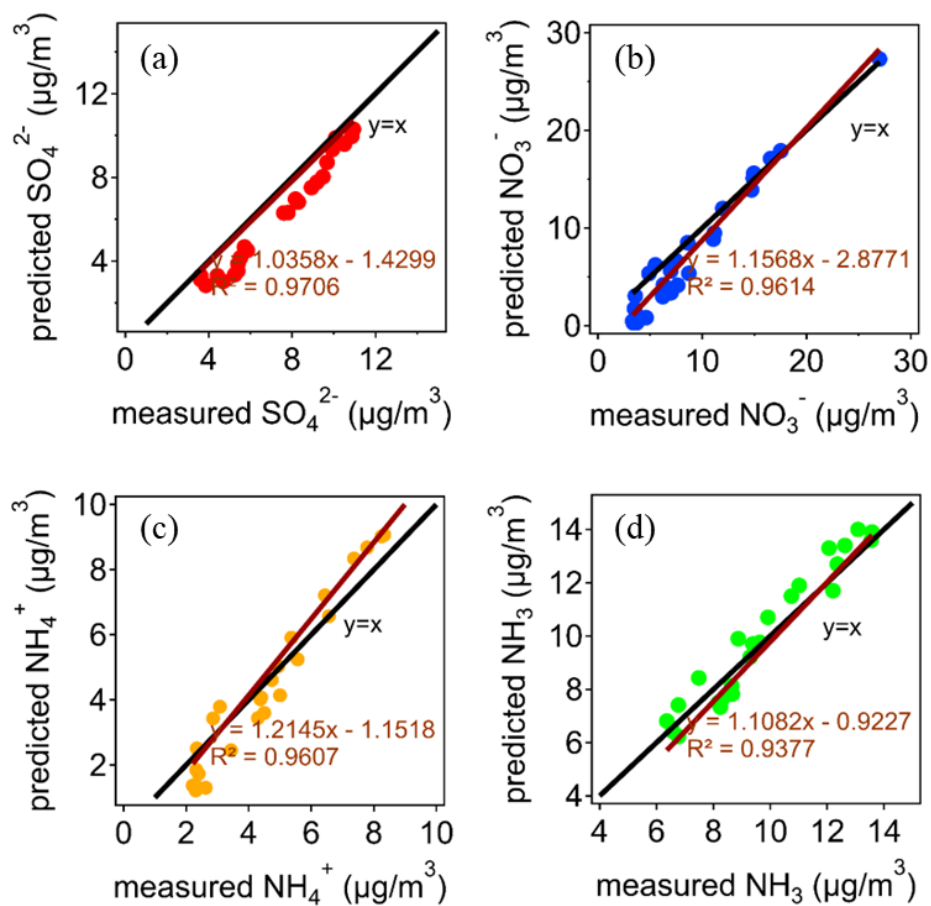

Figure S6. Correlations between the ISORROPIA-II predicted and measured species of (a)  $\text{SO}_4^{2-}$ , (b)  $\text{NO}_3^-$ , (c)  $\text{NH}_4^+$ , and (d)  $\text{NH}_3$  for the  $\text{SO}_4^{2-}$ - $\text{NO}_3^-$ - $\text{NH}_4^+$ - $\text{Cl}^-$ - $\text{Ca}^{2+}$ - $\text{NH}_3$ - $\text{HCl}$ - $\text{HNO}_3$  system during P3



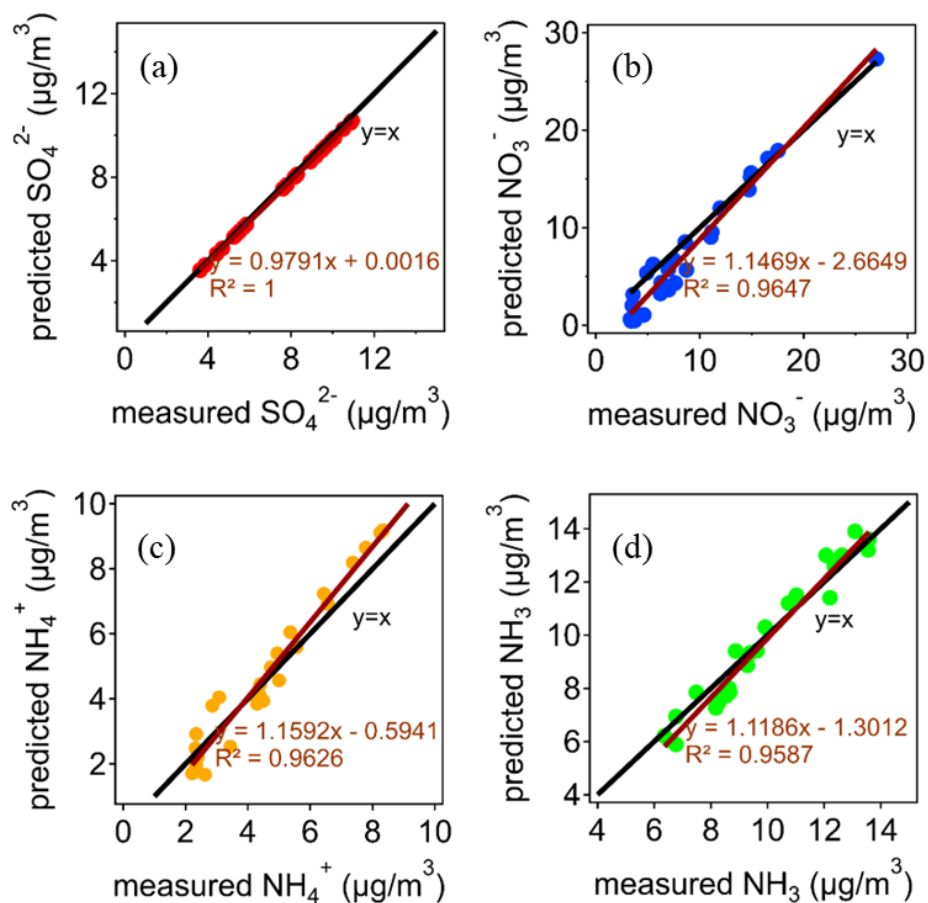

Figure S7. Correlations between the ISORROPIA-II predicted and measured species of (a)  $\text{SO}_4^{2-}$ , (b)  $\text{NO}_3^-$ , (c)  $\text{NH}_4^+$ , and (d)  $\text{NH}_3$  for the  $\text{SO}_4^{2-}$ - $\text{NO}_3^-$ - $\text{NH}_4^+$ - $\text{Cl}^-$ - $\text{Na}^+$ - $\text{NH}_3$ - $\text{HCl}$ - $\text{HNO}_3$  system during P3

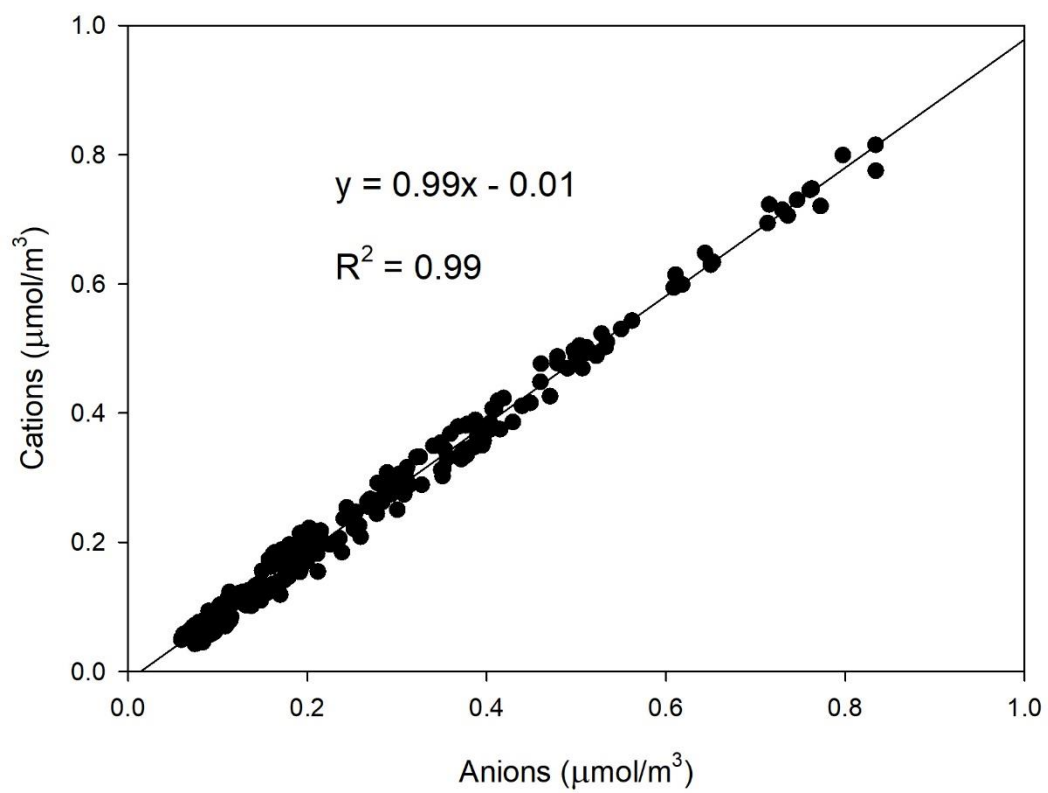

Figure S8. Ion balance during the whole study period.

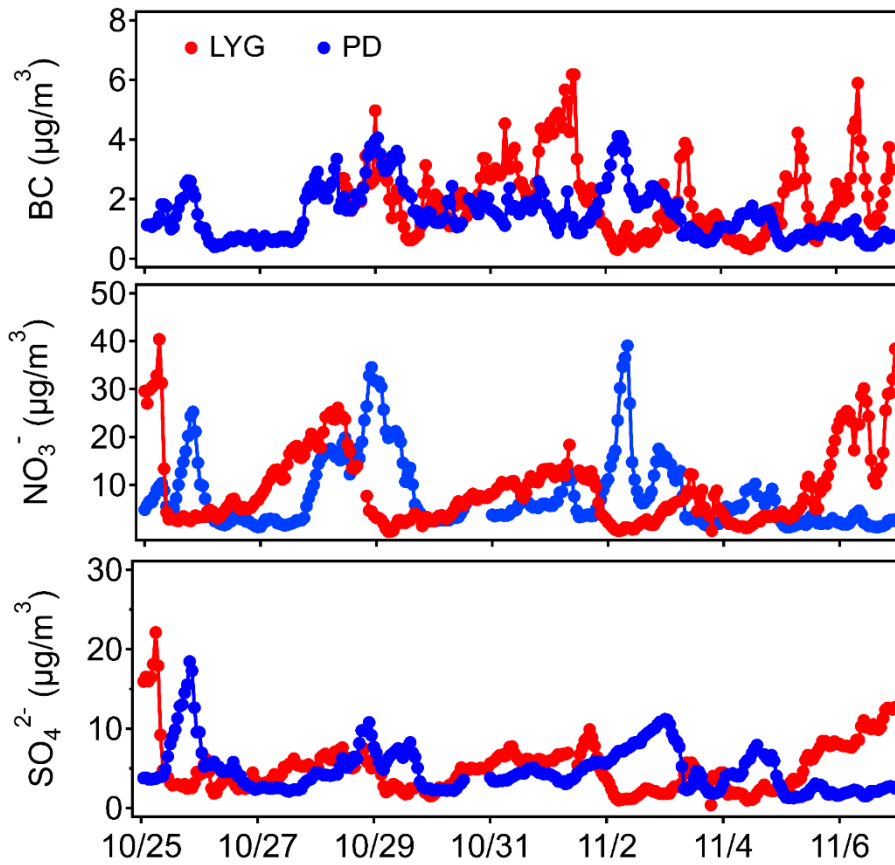

Figure S9. Time-series of BC, nitrate, and sulfate measured at LYG and PD during the study period.
